# Supplementary material for: Coal fly ash driven zeolites for the adsorptive removal of the ceftazidime drug
Source: Royal Society of Chemistry journal article supplement (doi:10.1039/d1ra02785a), 2021-01-01
Supplement: d1ra02785a1.pdf [file d1ra02785a1.pdf]

## SUPPLEMENTARY DATA

### Coal fly ash driven Zeolites for adsorptive removal of trace-level pharmaceuticals

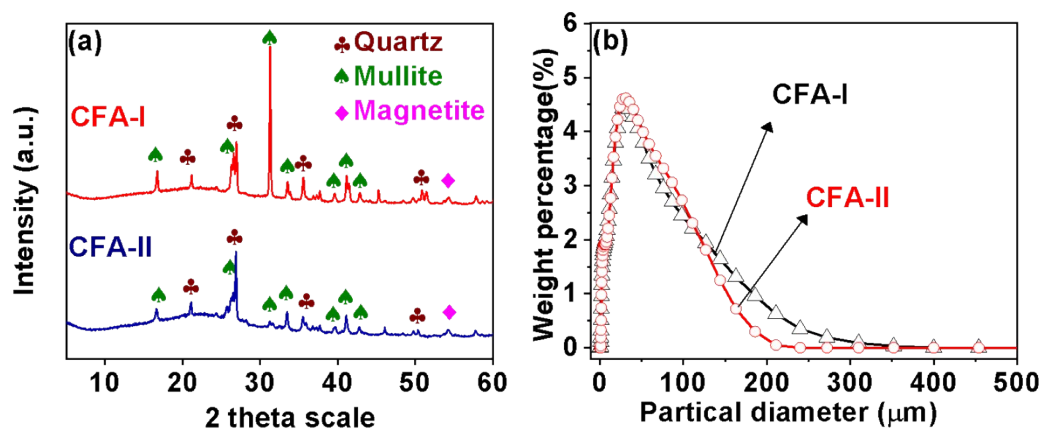

Figure S1 (1-b) The particle size distribution and XRD pattern of CFA1 and CFA2
